# Supplementary material for: Vascular remodeling is governed by a VEGFR3-dependent fluid shear stress set point
Source: eLife journal article supplement (doi:10.7554/elife.04645), 2015-02-02

VEGFR3

DAPI

Merged

Thoracic aorta

Vasa vasorum

Lumen

Lumen

Lumen

Inner curvature

Lumen

Lumen

Lumen

Carotid artery

Lumen

Lumen

Lumen

Outer curvature

Lumen

Lumen

Lumen

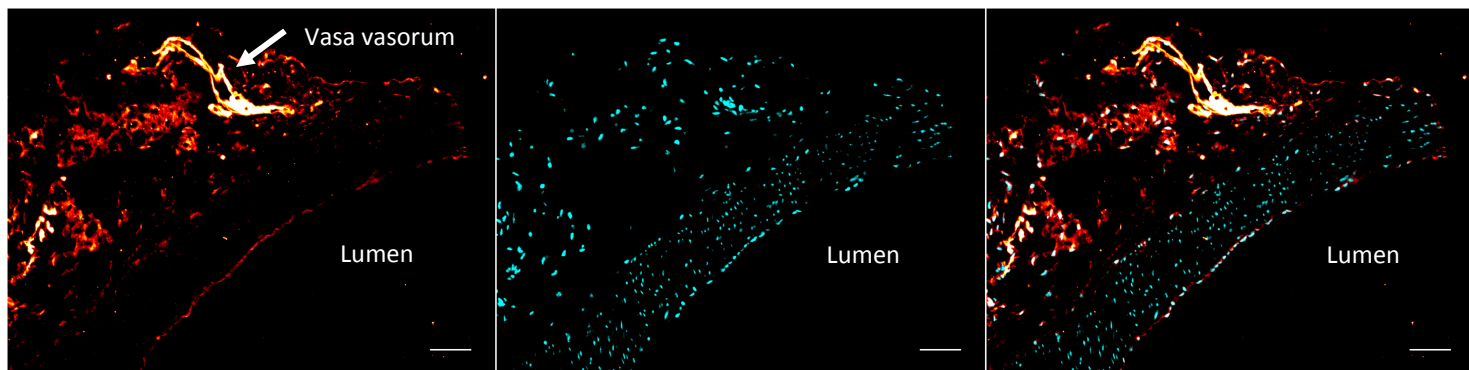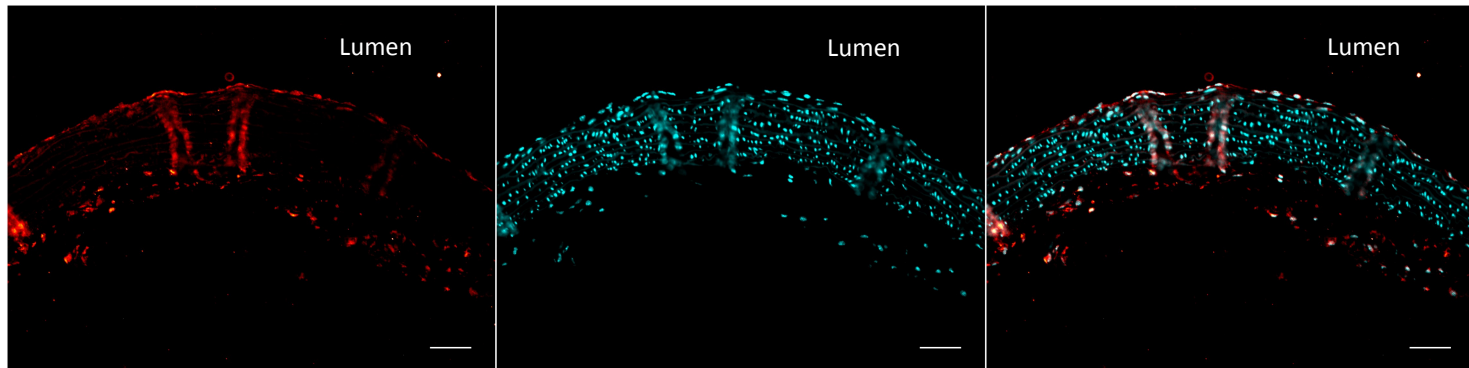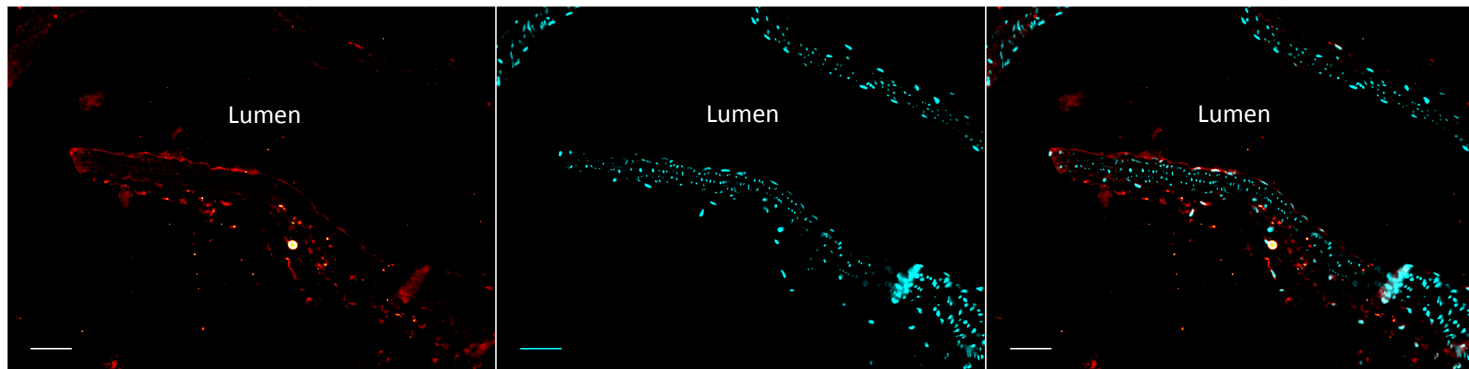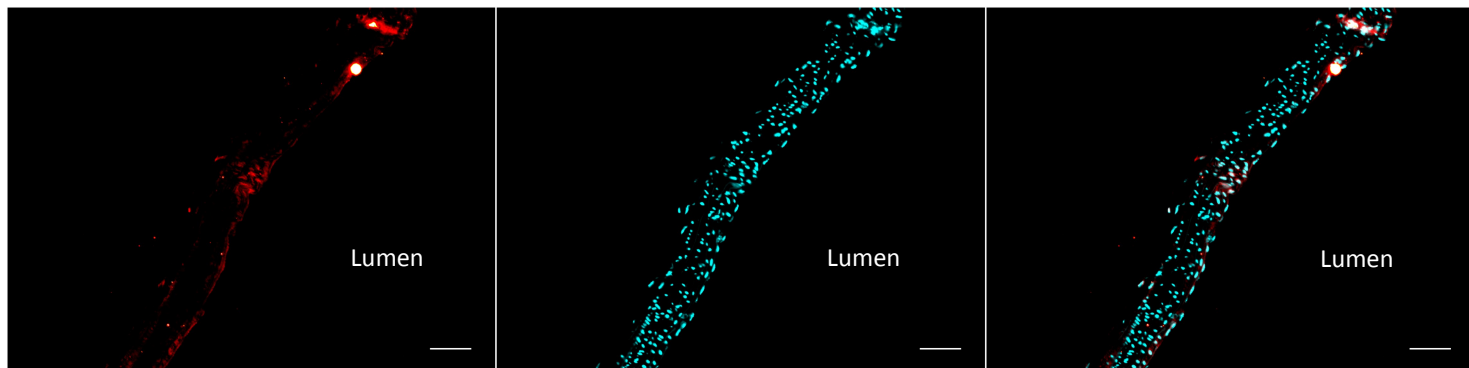

Supplement: supp [file elife-04645-supp-v1.zip]
