# Supplementary material for: Vascular remodeling is governed by a VEGFR3-dependent fluid shear stress set point
Source: eLife journal article supplement (doi:10.7554/elife.04645), 2015-02-02

### HDLEC + VEGFR3 siRNA

Shear stress ( $\text{dynes.cm}^{-2}$ )

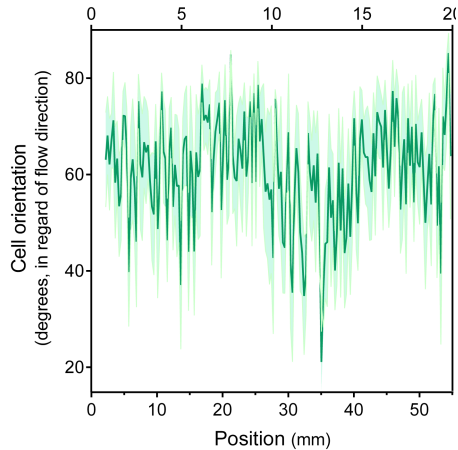

### HUVEC + mCherry

Shear stress ( $\text{dynes.cm}^{-2}$ )

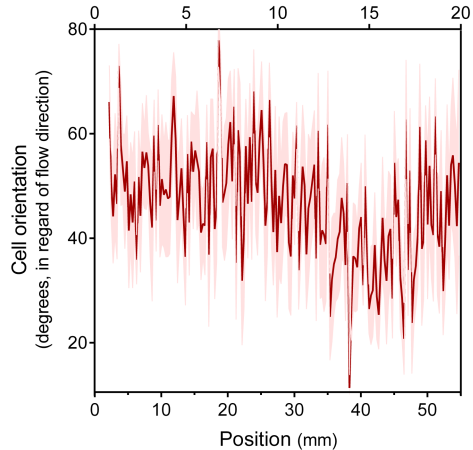

### HUVEC + hVEGFR3-GFP

Shear stress ( $\text{dynes.cm}^{-2}$ )

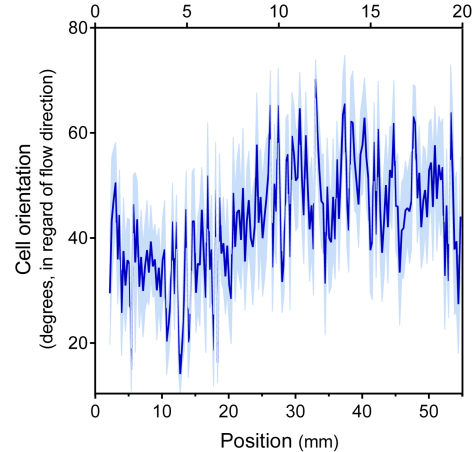

Supplement: supp [file elife-04645-supp-v1.zip]
