# Supplementary figures and images for: Vascular remodeling is governed by a VEGFR3-dependent fluid shear stress set point
Source: eLife journal article supplement (doi:10.7554/elife.04645), 2015-02-02

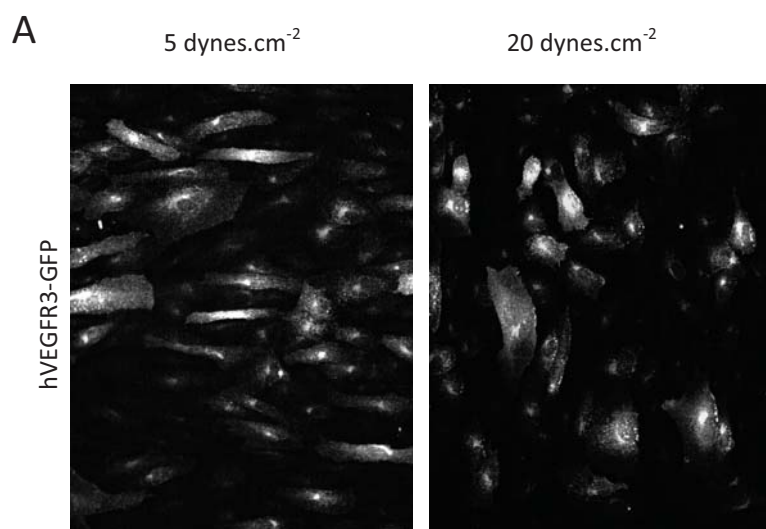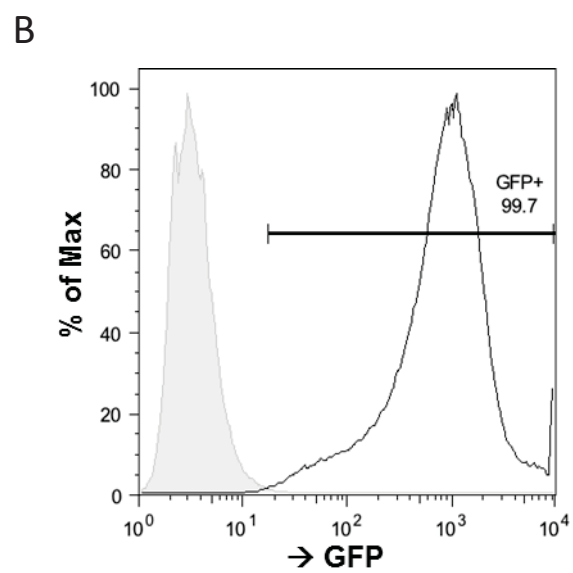

Supplement: supp [file elife-04645-supp-v1.zip]

A

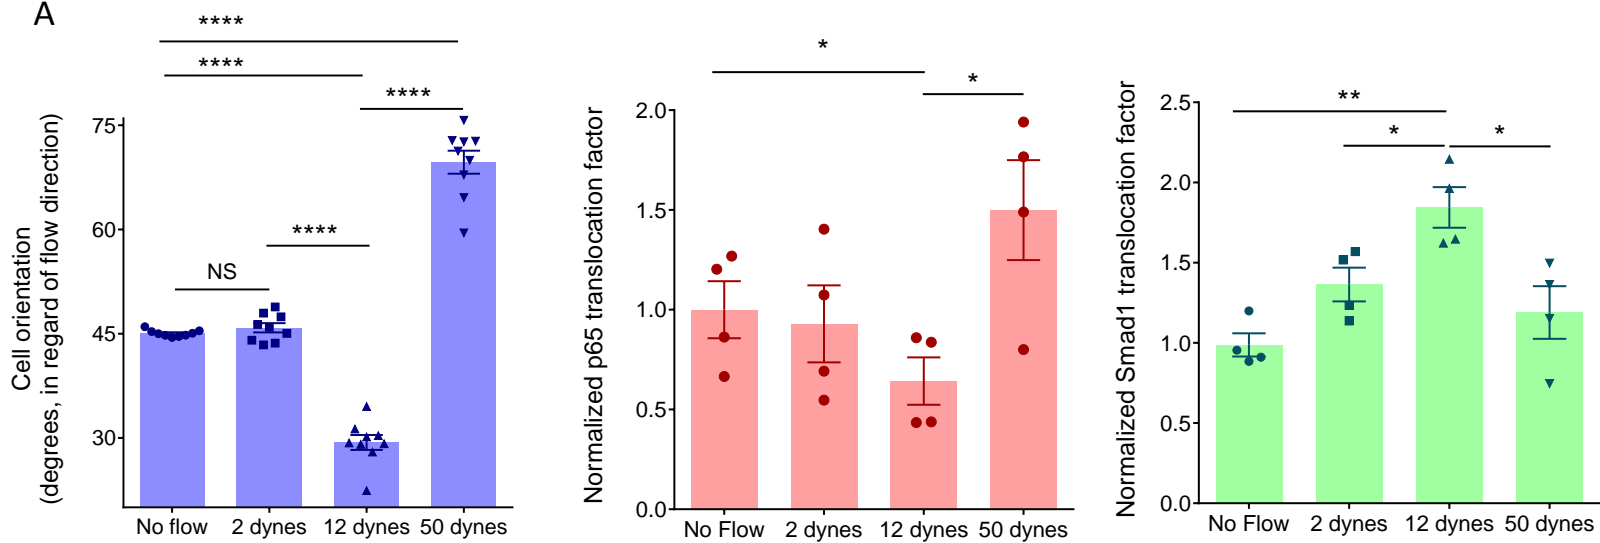

B

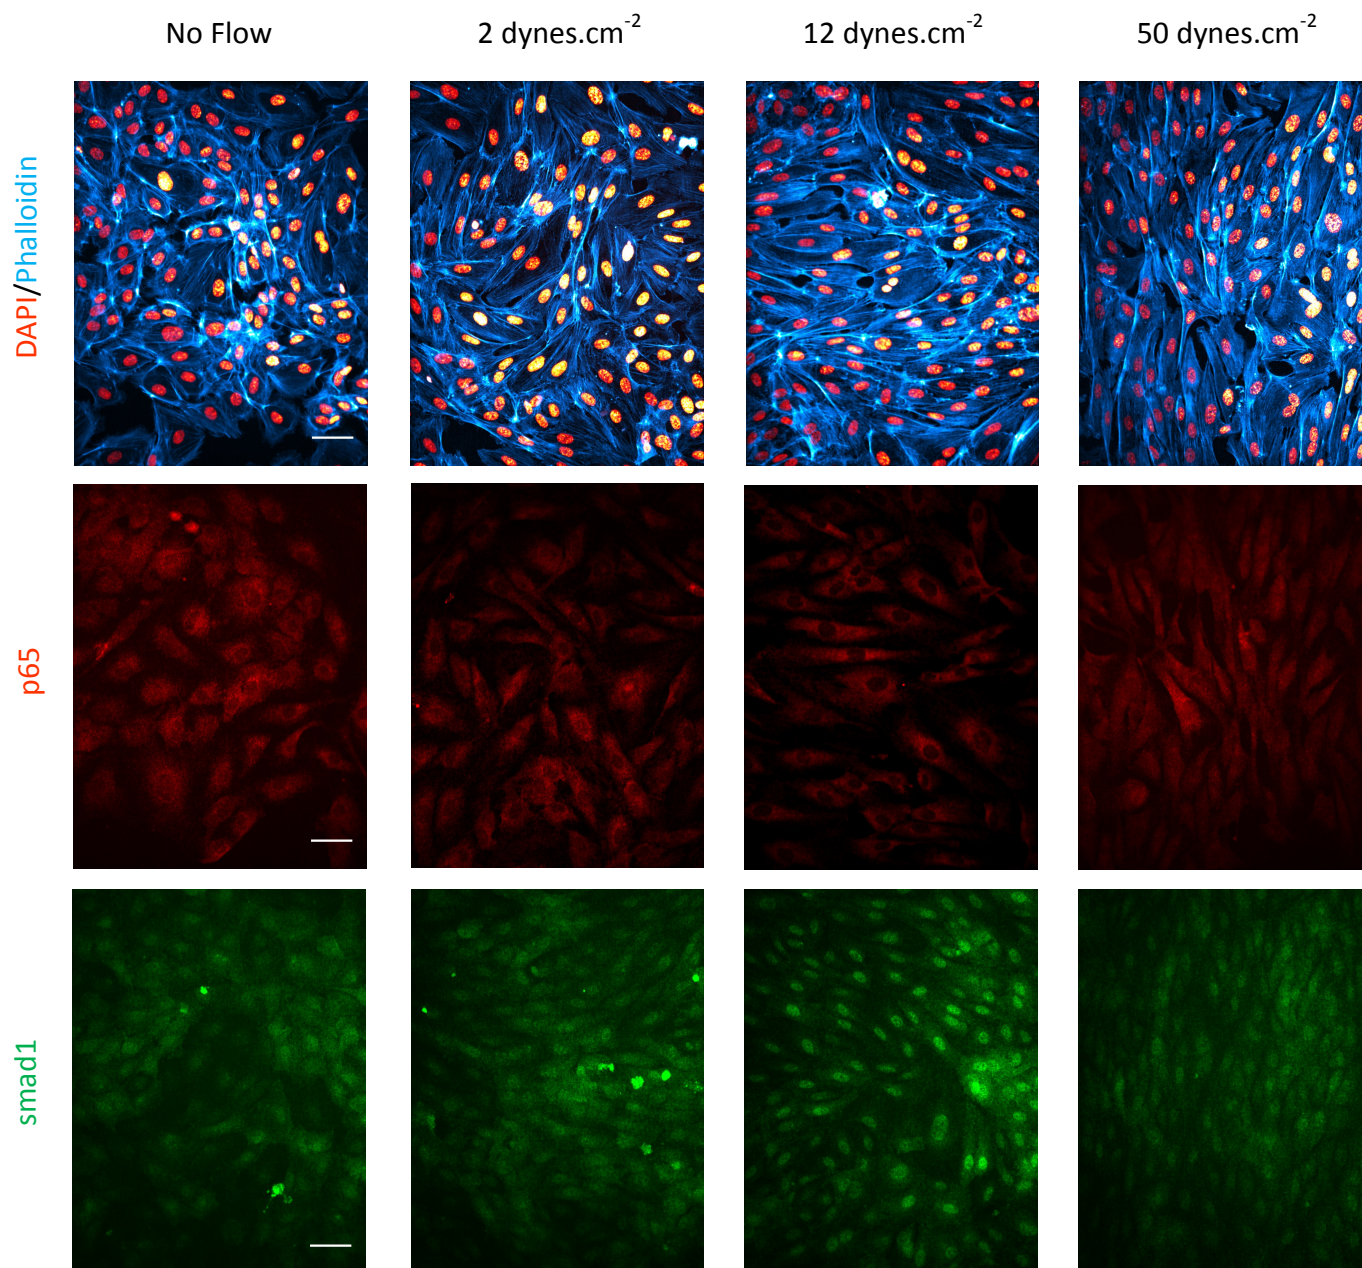

Supplement: supp [file elife-04645-supp-v1.zip]

Wildtype  
+ nifedipine

*flt4:Citrine*

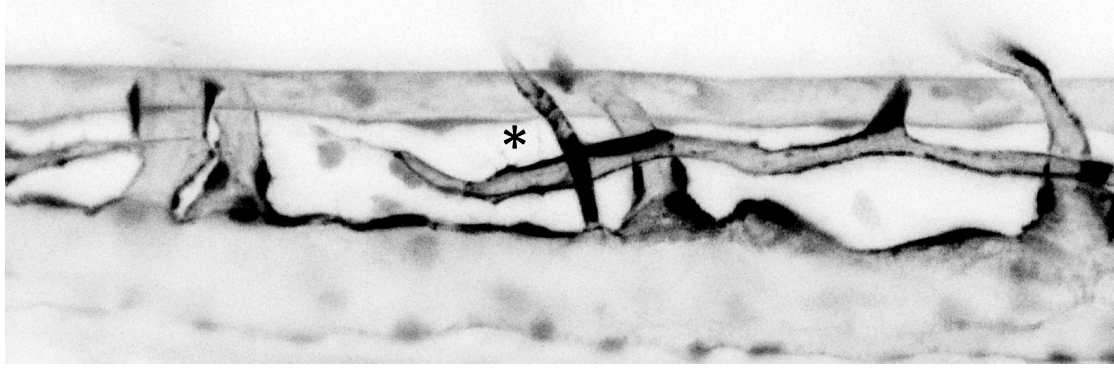

Wildtype

*flt4:Citrine*

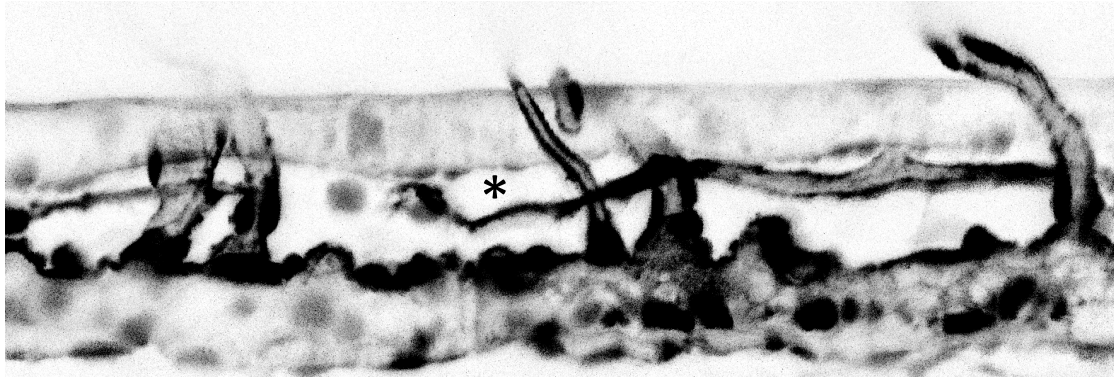

DA

PCV

DA

PCV

Supplement: supp [file elife-04645-supp-v1.zip]

5 dynes.cm<sup>-2</sup>

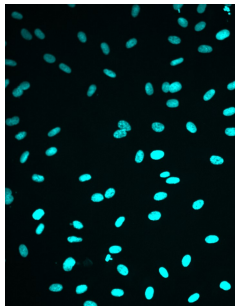

p65

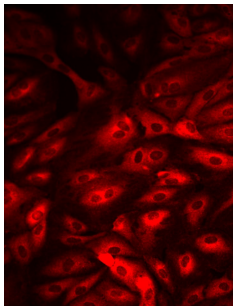

20 dynes.cm<sup>-2</sup>

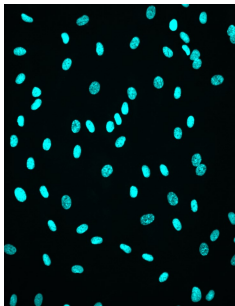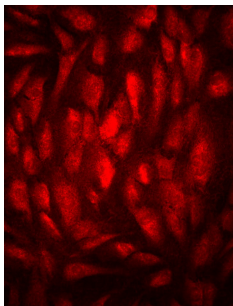

Supplement: supp [file elife-04645-supp-v1.zip]
